# Supplementary material
Source: PubMed Central journal article supplement (PMC2796297)
Supplement: NIHMS159903-supplement-Supp_Fig_s1_-_s2.pdf [file NIHMS159903-supplement-Supp_Fig_s1_-_s2.pdf]

Table S1: Results of Jurkat exosome proteomic analysis

| No | Accession No | Protein Name                                    | MW (Da) | Uniq Pept | Coverage (%) | Expectation Value | Protein family                |
|----|--------------|-------------------------------------------------|---------|-----------|--------------|-------------------|-------------------------------|
| 1  | Q86UX7       | Fermitin family homolog 3                       | 75954   | 1         | 1.3          | 0.00034           | Cell adhesion                 |
| 2  | P02751       | Fibronectin 1                                   | 262609  | 4         | 2.2          | 0.0000013         |                               |
| 3  | P13612       | Integrin, alpha 4                               | 115334  | 1         | 1.8          | 0.0063            |                               |
| 4  | Q08431       | Lactadherin precursor                           | 43123   | 1         | 2.8          | 0.00051           |                               |
| 5  | P08195       | Lymphocyte activation antigen 4F2 large subunit | 57945   | 1         | 2.5          | 0.000076          |                               |
| 6  | Q9HB10       | Parvin, gamma                                   | 37486   | 1         | 5.4          | 0.000089          |                               |
| 7  | Q14517       | Protocadherin Fat 1 precursor                   | 506282  | 1         | 0.3          | 0.000041          |                               |
| 8  | Q13308       | PTK7 protein tyrosine kinase 7                  | 118393  | 2         | 2.4          | 0.00000023        |                               |
| 9  | P07996       | Thrombospondin 1                                | 129384  | 12        | 9.2          | 0.0000036         |                               |
| 10 | O15143       | Actin related protein 2/3 complex, subunit 1B   | 40950   | 1         | 4.8          | 0.0000027         | Cell structure and motility   |
| 11 | O15144       | Actin related protein 2/3 complex, subunit 2    | 34333   | 5         | 19.3         | 0.0000032         |                               |
| 12 | P60709       | Actin, beta                                     | 41737   | 21        | 55.5         | 7.2E-09           |                               |
| 13 | Q9BYX7       | Actin, beta-like 3                              | 42017   | 4         | 12.5         | 0.0000013         |                               |
| 14 | P42025       | Actin-related protein 1 homolog B               | 42294   | 1         | 4            | 0.00000006        |                               |
| 15 | P04083       | Annexin 1                                       | 38715   | 1         | 6.9          | 0.000058          |                               |
| 16 | P42025       | Beta-centractin                                 | 42294   | 1         | 4            | 0.00000006        |                               |
| 17 | P31146       | Coronin-1A                                      | 51027   | 14        | 20.6         | 0.00000014        |                               |
| 18 | Q14204       | Cytoplasmic dynein 1 heavy chain 1              | 532412  | 17        | 4.1          | 0.000000047       |                               |
| 19 | Q99426       | Cytoskeleton associated protein 1               | 27326   | 7         | 40.2         | 0.0000016         |                               |
| 20 | P15311       | Ezrin                                           | 69413   | 2         | 4.8          | 0.00053           |                               |
| 21 | P52907       | F-actin capping protein alpha-1 subunit         | 32923   | 4         | 21           | 0.0000045         |                               |
| 22 | P47755       | F-actin capping protein alpha-2 subunit         | 32949   | 3         | 15           | 0.000084          |                               |
| 23 | P47756       | F-actin capping protein beta subunit            | 31351   | 3         | 13.7         | 0.0003            |                               |
| 24 | P21333       | Filamin-A                                       | 280741  | 9         | 5            | 0.00000019        |                               |
| 25 | P06396       | Gelsolin                                        | 85698   | 11        | 12           | 0.00000061        |                               |
| 26 | P26038       | Moesin                                          | 67821   | 2         | 3.1          | 0.00063           |                               |
| 27 | P35580       | Myosin-10                                       | 228941  | 2         | 1.1          | 0.000064          |                               |
| 28 | P35579       | Myosin-9                                        | 226534  | 7         | 4            | 0.000011          |                               |
| 29 | Q71U36       | Tubulin alpha 1a, alpha 1b                      | 50136   | 11        | 34.8         | 8.8E-09           |                               |
| 30 | Q13748       | Tubulin alpha 3c/d, alpha 3e                    | 49960   | 9         | 29.6         | 8.8E-09           |                               |
| 31 | P07437       | Tubulin beta                                    | 49671   | 13        | 28.2         | 0.00000091        |                               |
| 32 | P68371       | Tubulin beta 2C                                 | 49832   | 14        | 31.5         | 0.0000039         |                               |
| 33 | P04350       | Tubulin beta 4                                  | 49586   | 5         | 12.6         | 0.000005          |                               |
| 34 | Q99867       | Tubulin beta polypeptide 4, member Q            | 48435   | 4         | 7.8          | 0.0000057         |                               |
| 35 | P68366       | Tubulin, alpha 4a                               | 49925   | 12        | 37.9         | 0.00000015        |                               |
| 36 | P08670       | Vimentin                                        | 53652   | 2         | 4.9          | 0.000065          |                               |
| 37 | P11142       | Heat shock 70kDa protein 8                      | 70899   | 20        | 33.4         | 8.1E-09           |                               |
| 38 | P07900       | Heat shock 90kD protein 1, alpha                | 84660   | 16        | 24.2         | 3.3E-09           |                               |
| 39 | P08238       | Heat shock 90kDa protein 1, beta                | 83265   | 20        | 30.5         | 1.2E-10           |                               |
| 40 | O43765       | Small glutamine-rich tetratricopeptide          | 34063   | 1         | 4.2          | 0.00000018        |                               |
| 41 | P78371       | T-complex protein 1 subunit beta                | 57489   | 1         | 2.8          | 0.000098          |                               |
| 42 | P17987       | T-complex protein 1, alpha subunit              | 60344   | 18        | 36.9         | 7.8E-09           |                               |
| 43 | P50991       | T-complex protein 1, delta subunit              | 57925   | 17        | 32.5         | 0.000000014       |                               |
| 44 | P48643       | T-complex protein 1, epsilon subunit            | 59672   | 20        | 32.5         | 0.000000086       |                               |
| 45 | Q99832       | T-complex protein 1, eta subunit                | 59367   | 15        | 30.9         | 0.00000069        |                               |
| 46 | P49368       | T-complex protein 1, gamma subunit              | 60535   | 22        | 40.9         | 0.00000024        |                               |
| 47 | P50990       | T-complex protein 1, theta subunit              | 59621   | 19        | 36.3         | 7.6E-09           |                               |
| 48 | P40227       | T-complex protein 1, zeta subunit               | 58025   | 14        | 27.9         | 0.00000033        |                               |
| 49 | P06493       | Cell division cycle 2 protein                   | 34096   | 19        | 76.1         | 0.0000001         |                               |
| 50 | P61289       | Proteasome activator complex subunit 3          | 29506   | 4         | 19.7         | 0.00000041        | Ubiquitin conjugation process |
| 51 | O95456       | Proteasome assembly chaperone 1                 | 32854   | 3         | 10.8         | 0.000018          |                               |
| 52 | P25786       | Proteasome subunit alpha type-1                 | 29556   | 2         | 9.9          | 0.00081           |                               |
| 53 | P62988       | Ubiquitin                                       | 8565    | 3         | 50           | 0.0000016         |                               |
| 54 | P22314       | Ubiquitin-like modifier-activating enzyme 1     | 117850  | 10        | 11.8         | 0.000000034       |                               |
| 55 | P55072       | Valosin-containing protein                      | 89323   | 6         | 9.1          | 0.00004           |                               |

|    |        |                                                                  |        |    |      |            |                               |
|----|--------|------------------------------------------------------------------|--------|----|------|------------|-------------------------------|
| 56 | P50995 | Annexin A11                                                      | 54390  | 1  | 3.2  | 0.00072    | Membrane transport and fusion |
| 57 | P50995 | Annexin A11                                                      | 54390  | 1  | 3.2  | 0.00072    |                               |
| 58 | P07355 | Annexin A2                                                       | 38604  | 2  | 7.7  | 0.00017    |                               |
| 59 | P08758 | Annexin A5                                                       | 35937  | 7  | 25.6 | 0.0000012  |                               |
| 60 | P08133 | Annexin A6                                                       | 75874  | 3  | 4.6  | 0.000014   |                               |
| 61 | P20073 | Annexin A7                                                       | 52740  | 4  | 8    | 0.000085   |                               |
| 62 | P20645 | Cation-dependent mannose-6-phosphate receptor                    | 30994  | 2  | 12.6 | 0.00000004 |                               |
| 63 | P11717 | Cation-independent mannose-6-phosphate receptor                  | 274278 | 4  | 1.7  | 0.00000015 |                               |
| 64 | Q15027 | Centaurin-beta-1                                                 | 81537  | 1  | 1.6  | 0.000032   |                               |
| 65 | Q00610 | Clathrin heavy chain 1                                           | 191616 | 24 | 18.3 | 2.3E-09    |                               |
| 66 | P09496 | Clathrin, light chain                                            | 27077  | 3  | 12.1 | 0.00014    |                               |
| 67 | P53621 | Coatamer protein complex, subunit alpha                          | 138333 | 2  | 1.6  | 0.0000012  |                               |
| 68 | O14579 | Coatamer protein complex, subunit epsilon                        | 34482  | 12 | 59.1 | 1.3E-10    |                               |
| 69 | P01891 | HLA class I histocompatibility antigen, $\alpha$ chain precursor | 40909  | 1  | 2.5  | 0.000016   |                               |
| 70 | Q969P0 | Immunoglobulin superfamily member 8 precursor                    | 65035  | 3  | 5.7  | 0.0000028  |                               |
| 71 | Q8WUM4 | Programmed cell death 6-interacting protein                      | 96024  | 8  | 11.8 | 0.00000028 |                               |
| 72 | Q86Y82 | Syntaxin 12                                                      | 31642  | 2  | 13   | 0.0000048  |                               |
| 73 | P41732 | Tetraspanin 7                                                    | 27575  | 2  | 10   | 8.2E-09    |                               |
| 74 | P02786 | Transferrin receptor                                             | 84872  | 2  | 3.2  | 0.000046   |                               |
| 75 | P62258 | I4-3-3 protein epsilon                                           | 29174  | 3  | 14.1 | 0.00062    |                               |
| 76 | Q01518 | Adenylate cyclase-associated protein 1                           | 51856  | 1  | 4    | 0.0016     |                               |
| 77 | Q15027 | Centaurin-beta-1                                                 | 81537  | 1  | 1.6  | 0.000032   |                               |
| 78 | P39748 | Flap structure-specific endonuclease 1                           | 42593  | 2  | 8.4  | 0.000026   |                               |
| 79 | P62873 | Guanine nucleotide binding protein, beta polypeptide 1           | 37377  | 2  | 9.4  | 0.0000054  |                               |
| 80 | P63244 | Guanine nucleotide binding protein, beta polypeptide 2           | 35077  | 11 | 39.1 | 0.00000011 |                               |
| 81 | P62879 | Guanine nucleotide-binding protein, beta-2 subunit               | 37331  | 5  | 12.6 | 0.000014   |                               |
| 82 | Q9HAV0 | Guanine nucleotide-binding protein, beta-4 subunit               | 37568  | 2  | 7.4  | 0.000039   |                               |
| 83 | P28482 | Mitogen-activated protein kinase 1                               | 41390  | 1  | 4.2  | 0.0000087  |                               |
| 84 | P62714 | Protein phosphatase 2, catalytic subunit, beta isoform           | 35575  | 11 | 41.1 | 0.00000017 |                               |
| 85 | P50395 | Rab GDP dissociation inhibitor beta                              | 50664  | 2  | 4.5  | 0.0004     |                               |
| 86 | P62826 | RAN, member RAS oncogene family                                  | 24423  | 6  | 32.4 | 0.00000021 |                               |
| 87 | Q13283 | Ras GTPase-activating protein-binding protein 1                  | 52165  | 1  | 2.4  | 0.0046     |                               |
| 88 | Q15493 | Regucalcin                                                       | 33253  | 1  | 5.7  | 0.0000011  |                               |
| 89 | O00560 | Syntenin                                                         | 32445  | 2  | 7.7  | 0.000028   |                               |
| 90 | Q9H0E2 | Toll interacting protein                                         | 30282  | 1  | 5.1  | 0.000036   | Signaling proteins            |

Table S2: Results of SupT1 exosome proteomic analysis

| No | Accession No | Protein Name                                          | MW (Da) | Uniq Pept | Coverage (%) | Expectation Value | Protein family                     |
|----|--------------|-------------------------------------------------------|---------|-----------|--------------|-------------------|------------------------------------|
| 1  | Q86UX7       | Fermitin family homolog 3                             | 75954   | 1         | 1.3          | 0.00034           | Cell adhesion                      |
| 2  | P02751       | Fibronectin 1                                         | 262609  | 4         | 2.2          | 0.0000013         |                                    |
| 3  | P35858       | Insulin-like growth factor binding protein            | 66036   | 11        | 5.4          | 0.0000017         |                                    |
| 4  | P13612       | Integrin, alpha 4                                     | 115334  | 1         | 1.8          | 0.0063            |                                    |
| 5  | P08195       | Lymphocyte activation antigen 4F2 large subunit       | 57945   | 1         | 2.5          | 0.000076          |                                    |
| 6  | P07996       | Thrombospondin 1                                      | 129384  | 12        | 9.2          | 0.0000036         |                                    |
| 7  | P68133       | Actin alpha 1                                         | 42051   | 14        | 28.4         | 0.0000017         | Cell structure and motility        |
| 8  | P62736       | Actin alpha 2                                         | 42009   | 14        | 28.4         | 0.0000017         |                                    |
| 9  | P63261       | Actin gamma 1                                         | 41793   | 4         | 16.8         | 0.00000082        |                                    |
| 10 | P63267       | Actin gamma 2                                         | 41877   | 14        | 28.5         | 0.0000017         |                                    |
| 11 | P60709       | Actin, beta                                           | 41737   | 21        | 55.5         | 7.2E-09           |                                    |
| 12 | P61163       | Actin-related protein 1 homolog A, contractin alpha   | 42614   | 9         | 48.4         | 0.0000017         |                                    |
| 13 | P61160       | Actin-related protein 2                               | 44761   | 6         | 16.4         | 0.0000017         |                                    |
| 14 | O96019       | Actin-related protein 4                               | 47461   | 1         | 1.9          | 0.0000017         |                                    |
| 15 | P04083       | Annexin I                                             | 38715   | 1         | 6.9          | 0.000058          |                                    |
| 16 | P31146       | Coronin, actin binding protein, 1A                    | 51027   | 9         | 24.2         | 0.0000017         |                                    |
| 17 | Q14204       | Dynein, cytoplasmic 1, heavy chain 1                  | 532412  | 17        | 4.1          | 0.000000047       |                                    |
| 18 | P15311       | Ezrin                                                 | 69413   | 2         | 4.8          | 0.00053           |                                    |
| 19 | P47755       | F-actin capping protein alpha-2 subunit               | 32949   | 3         | 15           | 0.000084          |                                    |
| 20 | P21333       | Filamin A, alpha                                      | 280741  | 9         | 5            | 0.00000019        |                                    |
| 21 | Q9BSJ2       | Gamma-tubulin complex protein 2                       | 102535  | 2         | 2.8          | 0.00000092        |                                    |
| 22 | Q96CW5       | Gamma-tubulin complex protein 3                       | 103572  | 4         | 26.4         | 0.0000017         |                                    |
| 23 | P06396       | Gelsolin                                              | 85698   | 11        | 12           | 0.00000061        |                                    |
| 24 | P04792       | Heat shock 27kDa protein 1                            | 22783   | 7         | 9.8          | 0.0000017         |                                    |
| 25 | P33176       | Kinesin family member 5B                              | 109686  | 12        | 20.22        | 0.0000017         |                                    |
| 26 | P35580       | Myosin, heavy polypeptide 10, non-muscle              | 228941  | 2         | 1.1          | 0.000064          |                                    |
| 27 | P35579       | Myosin, heavy polypeptide 9, non-muscle               | 226534  | 7         | 4            | 0.000011          |                                    |
| 28 | P43034       | Platelet-activating factor acetylhydrolase, Ib, alpha | 46638   | 4         | 56.1         | 0.0000017         |                                    |
| 29 | Q15019       | Septin-2                                              | 41488   | 8         | 69.4         | 0.0000017         |                                    |
| 30 | Q14141       | Septin-6                                              | 49717   | 8         | 7.4          | 0.0000017         |                                    |
| 31 | Q16181       | Septin-7                                              | 50680   | 4         | 13.5         | 3.3E-09           |                                    |
| 32 | Q9UHD8       | Septin-9                                              | 65402   | 3         | 26.8         | 0.0000017         |                                    |
| 33 | P35749       | Smooth muscle myosin heavy chain 11                   | 227341  | 3         | 1.6          | 0.00003           |                                    |
| 34 | Q9Y490       | Talin 1                                               | 269769  | 8         | 41.5         | 0.0000017         |                                    |
| 35 | Q71U36       | Tubulin alpha 1a, alpha 1b                            | 50136   | 11        | 34.8         | 8.8E-09           |                                    |
| 36 | Q13748       | Tubulin alpha 3c, alpha 3e                            | 49960   | 9         | 29.6         | 8.8E-09           |                                    |
| 37 | Q9BQE3       | Tubulin alpha 6                                       | 49896   | 10        | 34.3         | 0.000000071       |                                    |
| 38 | Q9NY65       | Tubulin alpha 8                                       | 50094   | 7         | 24.7         | 0.000000071       |                                    |
| 39 | P07437       | Tubulin beta                                          | 49671   | 13        | 28.2         | 0.00000091        |                                    |
| 40 | Q9H4B7       | Tubulin beta 1                                        | 50327   | 4         | 7.5          | 0.00044           |                                    |
| 41 | Q13885       | Tubulin beta 2, beta 2B                               | 49907   | 9         | 20.7         | 0.000004          |                                    |
| 42 | Q13509       | Tubulin beta 3                                        | 50433   | 10        | 22.7         | 0.0000039         |                                    |
| 43 | P04350       | Tubulin beta 4, beta polypeptide 4 member Q           | 49586   | 5         | 12.6         | 0.000005          |                                    |
| 44 | P23258       | Tubulin gamma 1                                       | 51170   | 2         | 4.4          | 0.000072          |                                    |
| 45 | P50552       | Vasodilator-stimulated phosphoprotein                 | 39830   | 6         | 15.5         | 0.000017          |                                    |
| 46 | P11142       | Heat shock 70kDa protein 8                            | 70899   | 20        | 33.4         | 8.1E-09           | Heat shock proteins and chaperones |
| 47 | P07900       | Heat shock 90kD protein 1, alpha                      | 84660   | 16        | 24.2         | 3.3E-09           |                                    |
| 48 | P08238       | Heat shock 90kDa protein 1, beta                      | 83265   | 20        | 30.5         | 1.2E-10           |                                    |
| 49 | P17987       | T-complex protein 1, alpha subunit                    | 60344   | 18        | 36.9         | 7.8E-09           |                                    |
| 50 | P78371       | T-complex protein 1, beta subunit                     | 57489   | 1         | 2.8          | 0.000098          |                                    |

|    |        |                                                    |        |    |      |             |                                  |
|----|--------|----------------------------------------------------|--------|----|------|-------------|----------------------------------|
| 51 | P50991 | T-complex protein 1, delta subunit                 | 57925  | 17 | 32.5 | 0.00000014  |                                  |
| 52 | P48643 | T-complex protein 1, epsilon subunit               | 59672  | 12 | 66.9 | 0.000017    |                                  |
| 53 | Q99832 | T-complex protein 1, eta subunit                   | 59367  | 5  | 34.8 | 0.000017    |                                  |
| 54 | P49368 | T-complex protein 1, gamma subunit                 | 60535  | 22 | 40.9 | 0.00000024  |                                  |
| 55 | P50990 | T-complex protein 1, theta subunit                 | 59621  | 19 | 36.3 | 7.6E-09     |                                  |
| 56 | P40227 | T-complex protein 1, zeta subunit                  | 58025  | 14 | 27.9 | 0.00000033  |                                  |
| 57 | Q9BS26 | Thioredoxin domain containing 4                    | 46972  | 8  | 40   | 0.000017    |                                  |
| 58 | P06493 | Cell division cycle 2 protein                      | 34096  | 19 | 76.1 | 0.0000001   | Ubiquitin<br>conjugation process |
| 59 | Q86VP6 | Cullin-associated and neddylation-dissociated 1    | 136377 | 4  | 4    | 0.000017    |                                  |
| 60 | Q92530 | Proteasome inhibitor subunit 1                     | 29817  | 6  | 28.5 | 0.000017    |                                  |
| 61 | P62988 | Ubiquitin                                          | 8565   | 7  | 32   | 0.000017    |                                  |
| 62 | P45974 | Ubiquitin specific peptidase 5                     | 95787  | 8  | 18.7 | 0.000017    |                                  |
| 63 | P22314 | Ubiquitin-like modifier activating enzyme 1        | 117850 | 10 | 11.8 | 0.000000034 |                                  |
| 64 | P55072 | Valosin-containing protein                         | 89323  | 6  | 9.1  | 0.00004     |                                  |
| 65 | Q8WUM4 | AIP1, programmed cell death 6 interacting protein  | 96024  | 8  | 11.8 | 0.00000028  | Membrane transport and fusion    |
| 66 | P09525 | Annexin IV                                         | 35883  | 4  | 16.3 | 0.0000034   |                                  |
| 67 | P20073 | Annexin VII                                        | 52740  | 4  | 8    | 0.000085    |                                  |
| 68 | P50995 | Annexin XI                                         | 54390  | 1  | 3.2  | 0.00072     |                                  |
| 69 | Q00610 | Clathrin heavy chain 1                             | 191616 | 24 | 18.3 | 2.3E-09     |                                  |
| 70 | P53675 | Clathrin, heavy chain-like 1                       | 187032 | 1  | 0.7  | 0.0000033   |                                  |
| 71 | P09496 | Clathrin, light chain                              | 27077  | 3  | 12.1 | 0.00014     |                                  |
| 72 | P53621 | Coatomer protein complex, subunit alpha            | 138333 | 2  | 1.6  | 0.0000012   |                                  |
| 73 | P53618 | Coatomer protein complex, subunit beta 1           | 107143 | 9  | 35.7 | 0.000017    |                                  |
| 74 | P35606 | Coatomer protein complex, subunit beta 2           | 102488 | 8  | 15.8 | 0.000017    |                                  |
| 75 | O14579 | Coatomer protein complex, subunit epsilon          | 34482  | 12 | 59.1 | 1.3E-10     |                                  |
| 76 | P50570 | Dynamin 2                                          | 98065  | 14 | 30.5 | 0.000017    |                                  |
| 77 | P61106 | GTPase Rab14                                       | 23897  | 9  | 41.9 | 0.00000085  |                                  |
| 78 | P20645 | Mannose-6-phosphate receptor, cation dependent     | 30994  | 2  | 12.6 | 0.00000004  |                                  |
| 79 | P11717 | Mannose-6-phosphate receptor, cation-independent   | 274278 | 4  | 1.7  | 0.00000015  |                                  |
| 80 | P51149 | RAB7, member RAS oncogene family                   | 23490  | 12 | 41   | 0.000017    |                                  |
| 81 | P02786 | Transferrin receptor                               | 84872  | 2  | 3.2  | 0.000046    |                                  |
| 82 | Q92544 | Transmembrane 9 superfamily member 4               | 72542  | 5  | 23.8 | 0.0000017   |                                  |
| 83 | P31946 | I4-3-3 protein beta/alpha                          | 28083  | 8  | 47   | 0.0000017   |                                  |
| 84 | P25098 | Beta adrenergic receptor kinase 1                  | 79574  | 8  | 17.3 | 0.0000017   |                                  |
| 85 | P41240 | C-src tyrosine kinase                              | 50705  | 5  | 17.6 | 0.0000017   |                                  |
| 86 | P39748 | Flap structure-specific endonuclease 1             | 42593  | 2  | 8.4  | 0.000026    |                                  |
| 87 | P31150 | GDP dissociation inhibitor 1                       | 50583  | 3  | 7.8  | 0.0000017   |                                  |
| 88 | P63092 | GNAS complex locus                                 | 45665  | 13 | 46.9 | 0.0000017   |                                  |
| 89 | P63244 | Guanine nucleotide binding protein, beta 2-like 1  | 35077  | 11 | 39.1 | 0.000000011 |                                  |
| 90 | P62873 | Guanine nucleotide-binding protein, beta-1 subunit | 37377  | 2  | 9.4  | 0.0000054   |                                  |
| 91 | P62879 | Guanine nucleotide-binding protein, beta-2 subunit | 37331  | 5  | 12.6 | 0.000014    |                                  |
| 92 | Q9HAV0 | Guanine nucleotide-binding protein, beta-4 subunit | 37568  | 2  | 7.4  | 0.000039    |                                  |
| 93 | P28482 | Mitogen-activated protein kinase 1                 | 41390  | 1  | 4.2  | 0.0000087   |                                  |
| 94 | P62826 | RAN, member RAS oncogene family                    | 24423  | 6  | 32.4 | 0.00000021  |                                  |
